# Supplementary material for: In situ molten phase-assisted self-healing for maintaining fiber morphology during conversion from melamine diborate to boron nitride
Source: Royal Society of Chemistry journal article supplement (doi:10.1039/c9ra10292b), 2020-01-01
Supplement: c9ra10292b2.pdf [file c9ra10292b2.pdf]

## Supplementary Information

### In situ molten phase assisted self-healing for maintaining fiber's morphology in conversion from melamine diborate to boron nitride.

Chunzhi Wu<sup>a</sup>, Bing Wang<sup>a\*</sup>, Nan Wu<sup>b</sup>, Cheng Han<sup>a</sup>, Xiaoshan Zhang<sup>a</sup>, Yingde Wang<sup>a\*</sup>

<sup>a</sup> Science and Technology on Advanced Ceramic Fibers and Composites, College of Aerospace Science and Engineering, National University of Defense Technology, Changsha, 410073, PR China.

<sup>b</sup> Department of Materials Science and Engineering, College of Aerospace Science and Engineering, National University of Defense Technology, Changsha, 410073, PR China.

To study structural transformation of  $\text{H}_3\text{BO}_3$  and  $\text{C}_3\text{N}_6\text{H}_6$  separately, they were heated to 150 °C, 200 °C, 400 °C and immediately cooling down to accord with TG procedure. The XRD was used to characterize the  $\text{H}_3\text{BO}_3$  and  $\text{C}_3\text{N}_6\text{H}_6$  and their heated products. As shown in Figure S1a, boric acid ( $\text{H}_3\text{BO}_3$ , ICSD PDF#73-2158) converted into metaboric acid (including  $\alpha\text{-HBO}_2$ , ICSD PDF#77-0425 and  $\beta\text{-HBO}_2$ , ICSD PDF#76-0746) after treated at 150 °C, and in further totally converted into glass boron oxide ( $\text{g-B}_2\text{O}_3$ , ICSD PDF#06-0297) at 200 °C. The peaks of sassolite (ICSD PDF#30-0199) could be attributed to the moisture absorption of  $\text{B}_2\text{O}_3$ . In Figure S1b, the crystallinity of melamine became slightly poorer but remained  $\text{C}_3\text{N}_6\text{H}_6$  (ICSD PDF#39-1950) molecule stable when heated up to 200 °C and condensed into melem<sup>[1]</sup> when up to 400 °C.

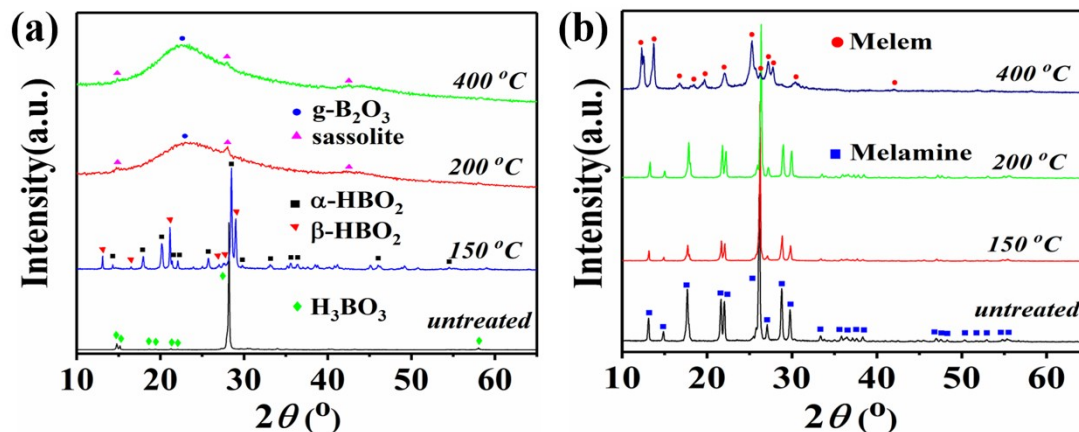

Figure S1 (a) XRD pattern of boric acid and its heating products and (b) melamine and its heating products after treated at 150 °C, 200 °C, 400 °C.

To further confirm the structural evolution,  $^{13}\text{C}$  nuclear magnetic resonance (NMR) spectrum was applied. All the  $^{13}\text{C}$  NMR spectrum was calibrated according to the septet peaks of  $\text{DMSO-d}_6$  solvent. As shown in figure S2, the chemical shift  $\delta$  of samples were 167.33 ppm ( $\text{C}_3\text{N}_6\text{H}_6$  in  $\text{DMSO-d}_6$ ), 165.23 ppm ( $\text{C}_3\text{N}_6\text{H}_6 \cdot 2\text{H}_3\text{BO}_3$  in  $\text{DMSO-d}_6$ ), 164.93 ppm ( $\text{M} \cdot 2\text{B}_{150}$  in  $\text{DMSO-d}_6$ ), 164.73 ppm ( $\text{M} \cdot 2\text{B}_{200}$  in  $\text{DMSO-d}_6$ ), respectively. It varied from pure melamine to  $\text{M} \cdot 2\text{B}$  and to  $\text{M} \cdot 2\text{B}_{150}$ , which may result from circumstance variation of  $\text{C}_3\text{N}_6\text{H}_6$  molecule. And the difference of C NMR spectra between  $\text{M} \cdot 2\text{B}_{150}$  and  $\text{M} \cdot 2\text{B}_{200}$  reveals the different structure, as depicted in FTIR, seemed to change from the (melamine) $\text{C-NH}_2$  to the  $\text{C-O-B}$ .

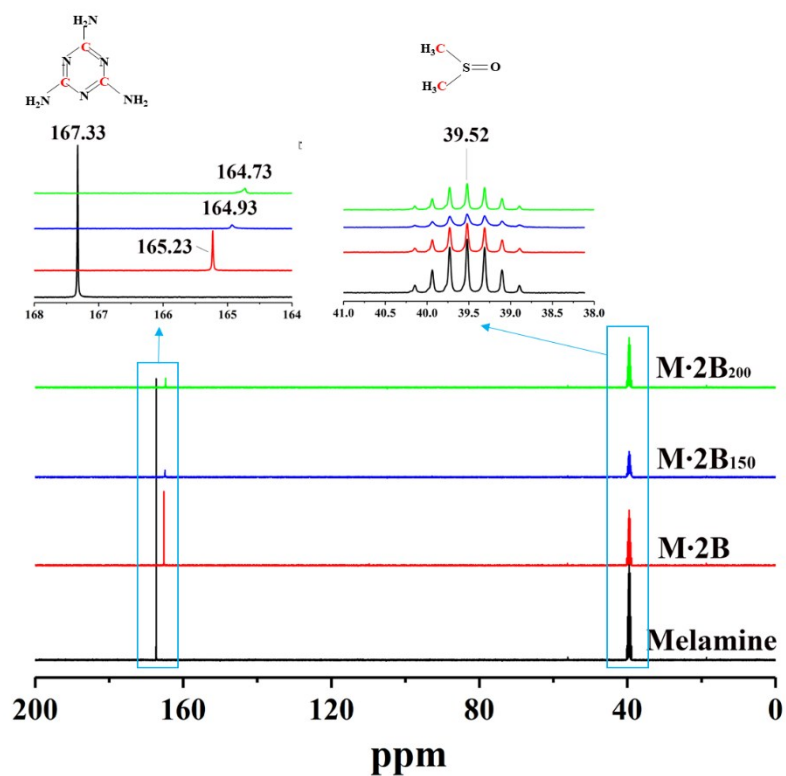

**Figure S2**  $^{13}\text{C}$  NMR spectra for melamine,  $\text{C}_3\text{N}_6\text{H}_6 \cdot 2\text{H}_3\text{BO}_3$  (M·2B) and its heated products after treated at 200 °C, 400 °C.

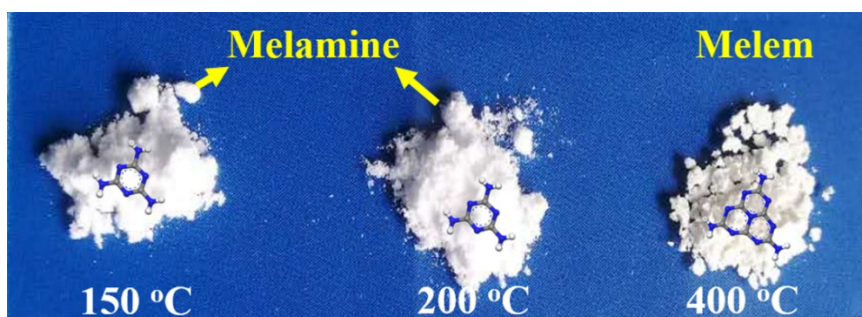

**Figure S3** Photographs of the heated products of original melamine: remained  $\text{C}_3\text{N}_6\text{H}_6$  at 150 °C and 200 °C, condensed into melem at 400 °C.

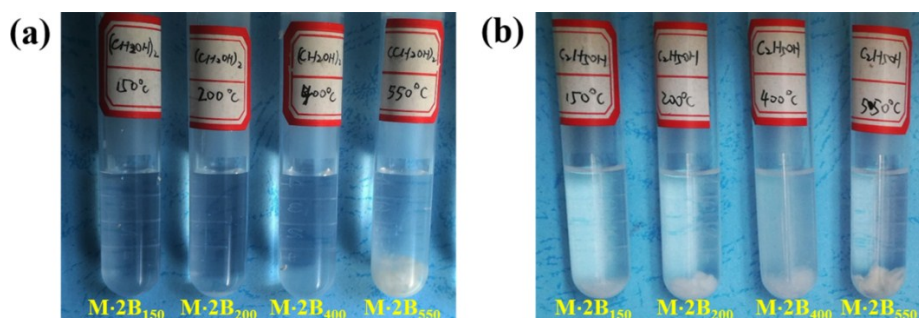

**Figure S4** Solubility of the thermal derivatives of M·2B (heated at 150 °C, 200 °C, 400 °C, 550 °C) in solvents after 6 hours (a) ethylene glycol (EG); (b) ethanol (EA).

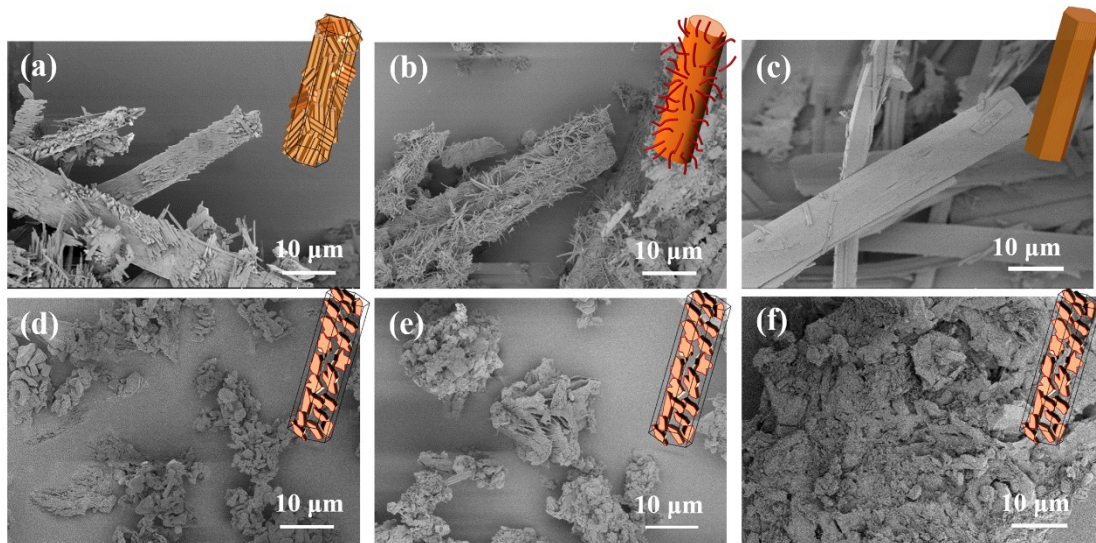

**Figure S5** SEM images of the corroded M·2B<sub>T</sub> fibers by EA and EG for 1 minute: (a) M·2B<sub>150</sub>, (b) M·2B<sub>200</sub> (c) M·2B<sub>400</sub> after immersed in ethanol (EA); (d) M·2B<sub>150</sub>, (e) M·2B<sub>200</sub>, (f) M·2B<sub>400</sub> after immersed in ethylene glycol (EG). The insets are the corresponding diagram illustration.

## Reference

- [1] H.B. Zheng, W. Chen, H. Gao, Y.Y. Wang, H.Y. Guo, S.Q. Guo, Z.L. Tang, J.Y. Zhang, *Journal of Materials Chemistry C* 5 (2017) 10746–10753.
